# Supplementary material for: Mapping a brain parasite: occurrence and spatial distribution in fish encephalon
Source: bioRxiv or medRxiv preprint supplement (doi:10.1101/2023.01.26.525646), 2023-01-26
Supplement: Supplementary file [file media-1.pdf]

## **Supplementary Materials**

### **Mapping a brain parasite: occurrence and spatial distribution in fish encephalon**

**Ana Born-Torrijos<sup>1,2\*</sup>, Gabrielle S. van Beest<sup>1,3</sup>, Paolo Merella<sup>4</sup>, Giovanni Garippa<sup>4</sup>, Juan Antonio Raga<sup>3</sup>, Francisco E. Montero<sup>3</sup>**

<sup>1</sup> Institute of Parasitology, Biology Centre of the Czech Academy of Sciences, Branišovská 31, 370 05 České Budějovice, Czech Republic.

<sup>2</sup> Department of Coastal Systems, NIOZ Royal Netherlands Institute for Sea Research, Den Burg, Texel, Netherlands.

<sup>3</sup> Cavanilles Institute for Biodiversity and Evolutionary Biology, Science Park, University of Valencia, PO Box 22 085, 46071 Valencia, Spain.

<sup>4</sup> Dipartimento di Medicina Veterinaria, Università di Sassari, Sassari, Italy

**\* Corresponding author:**

Ana Born-Torrijos

borntorrijos.ana@gmail.com

**Table S1.** Results of linear model (LM) evaluating the differences in number of metacercariae of *Cardiocephaloides longicollis* depending on the brain region and the group of fish ((i), experimental vs wild gilthead seabream, and (ii) striped seabream vs wild gilthead seabream) (LM, log(No. metacercariae) ~ Brain region × Fish group + No. total metacercariae). The intercept contains the reference variable ‘Olf-B’ and (i) ‘experimental gilthead seabream’ or (ii) ‘wild striped seabream’. R<sup>2</sup> represents the variability explained by fixed effects, and statistically significant results are in bold ( $\alpha=0.05$ ).

|      | LM                                       | Estimate                    | SE                          | t-value       | P                |
|------|------------------------------------------|-----------------------------|-----------------------------|---------------|------------------|
| (i)  | R <sup>2</sup> = 0.69                    |                             |                             |               |                  |
|      | Intercept (Olf-B; experim. fish)         | -0.4078                     | 0.2332                      | -1.749        | 0.083            |
|      | <b>Olf-L</b>                             | <b>0.9940</b>               | <b>0.2663</b>               | <b>3.732</b>  | <b>&lt;0.001</b> |
|      | <b>Op-L</b>                              | <b>3.444</b>                | <b>0.2663</b>               | <b>12.932</b> | <b>&lt;0.001</b> |
|      | <b>ICL</b>                               | <b>0.8148</b>               | <b>0.2663</b>               | <b>3.059</b>  | <b>0.003</b>     |
|      | SCL                                      | 0.5195                      | 0.2663                      | 1.950         | 0.054            |
|      | <b>Mo</b>                                | <b>0.6441</b>               | <b>0.2663</b>               | <b>2.418</b>  | <b>0.017</b>     |
|      | SC                                       | 1.126 <sup>e-15</sup>       | 0.2663                      | 0.000         | 1.000            |
|      | wild <i>S. aurata</i>                    | 0.3550                      | 0.4171                      | 0.851         | 0.397            |
|      | <b>TotalBrain</b>                        | <b>8.133<sup>e-03</sup></b> | <b>2.743<sup>e-03</sup></b> | <b>2.965</b>  | <b>0.004</b>     |
|      | OlfL_total × wild <i>S. aurata</i>       | -0.9940                     | 0.5650                      | -1.759        | 0.081            |
|      | <b>OpL_total</b> × wild <i>S. aurata</i> | <b>-2.3750</b>              | <b>0.5650</b>               | <b>-4.204</b> | <b>&lt;0.001</b> |
|      | ICL_total × wild <i>S. aurata</i>        | -0.8148                     | 0.5650                      | -1.442        | 0.152            |
|      | SCL_total × wild <i>S. aurata</i>        | -0.5195                     | 0.5650                      | -0.919        | 0.360            |
|      | Mo_total × wild <i>S. aurata</i>         | 0.4180                      | 0.5650                      | 0.740         | 0.461            |
|      | SC_total × wild <i>S. aurata</i>         | 1.670 <sup>e-16</sup>       | 0.5650                      | 0.000         | 1.000            |
| (ii) | R <sup>2</sup> = 0.44                    |                             |                             |               |                  |
|      | Intercept (Olf-B; wild str. seabream)    | -0.1304                     | 0.1982                      | -0.658        | 0.513            |
|      | Olf-L                                    | 1.934 <sup>e-15</sup>       | 0.2481                      | 0.000         | 1.000            |
|      | <b>Op-L</b>                              | <b>0.940</b>                | <b>0.2481</b>               | <b>3.788</b>  | <b>&lt;0.001</b> |
|      | ICL                                      | 0.1569                      | 0.2481                      | 0.633         | 0.529            |
|      | SCL                                      | 9.663 <sup>e-16</sup>       | 0.2481                      | 0.000         | 1.000            |
|      | <b>Mo</b>                                | <b>0.5919</b>               | <b>0.2481</b>               | <b>2.386</b>  | <b>0.020</b>     |
|      | SC                                       | 9.801 <sup>e-16</sup>       | 0.2481                      | 0.000         | 1.000            |
|      | wild <i>S. aurata</i>                    | 0.0344                      | 0.2919                      | -0.118        | 0.907            |
|      | TotalBrain                               | 0.0254                      | 0.0179                      | 1.415         | 0.162            |
|      | OlfL_total × wild <i>S. aurata</i>       | -9.489 <sup>e-16</sup>      | 0.4114                      | 0.000         | 1.000            |
|      | OpL_total × wild <i>S. aurata</i>        | 0.1293                      | 0.4114                      | 0.314         | 0.754            |
|      | ICL_total × wild <i>S. aurata</i>        | -0.1569                     | 0.4114                      | -0.381        | 0.704            |
|      | SCL_total × wild <i>S. aurata</i>        | -8.437 <sup>e-16</sup>      | 0.4114                      | 0.000         | 1.000            |
|      | Mo_total × wild <i>S. aurata</i>         | 0.4702                      | 0.4114                      | 1.143         | 0.257            |
|      | SC_total × wild <i>S. aurata</i>         | -9.226 <sup>e-16</sup>      | 0.4114                      | 0.000         | 1.000            |

**Table S2.** Results of linear model (LM) evaluating the differences in number of encysted metacercariae of *Cardiocephaloides longicollis* depending on infection dose (low vs high), using the fish standard length as covariable (LM, No metacercariae ~ Fish size + Infection dose). The intercept contains the reference variable low infection dose. R<sup>2</sup> represents the variability explained by fixed effects, and statistically significant results are in bold ( $\alpha=0.05$ ).

| LM                    | Estimate      | SE            | t-value      | P                |
|-----------------------|---------------|---------------|--------------|------------------|
| R <sup>2</sup> = 0.48 |               |               |              |                  |
| Intercept (low dose)  | 0.3098        | 0.4358        | 0.711        | 0.480            |
| Standard length       | 0.1024        | 0.0522        | 1.962        | 0.054            |
| <b>High dose</b>      | <b>0.0107</b> | <b>0.0028</b> | <b>3.841</b> | <b>&lt;0.001</b> |

**Figure S1.** Variation in the number of encysted metacercariae of *Cardiocephaloides longicollis* depending on the infection dose. Box plots represent the median number of metacercariae per infection dose, upper and lower quartile (box) with maximum and minimum ranges (whiskers) and outliers (grey circles). Dots represent jittered raw data.

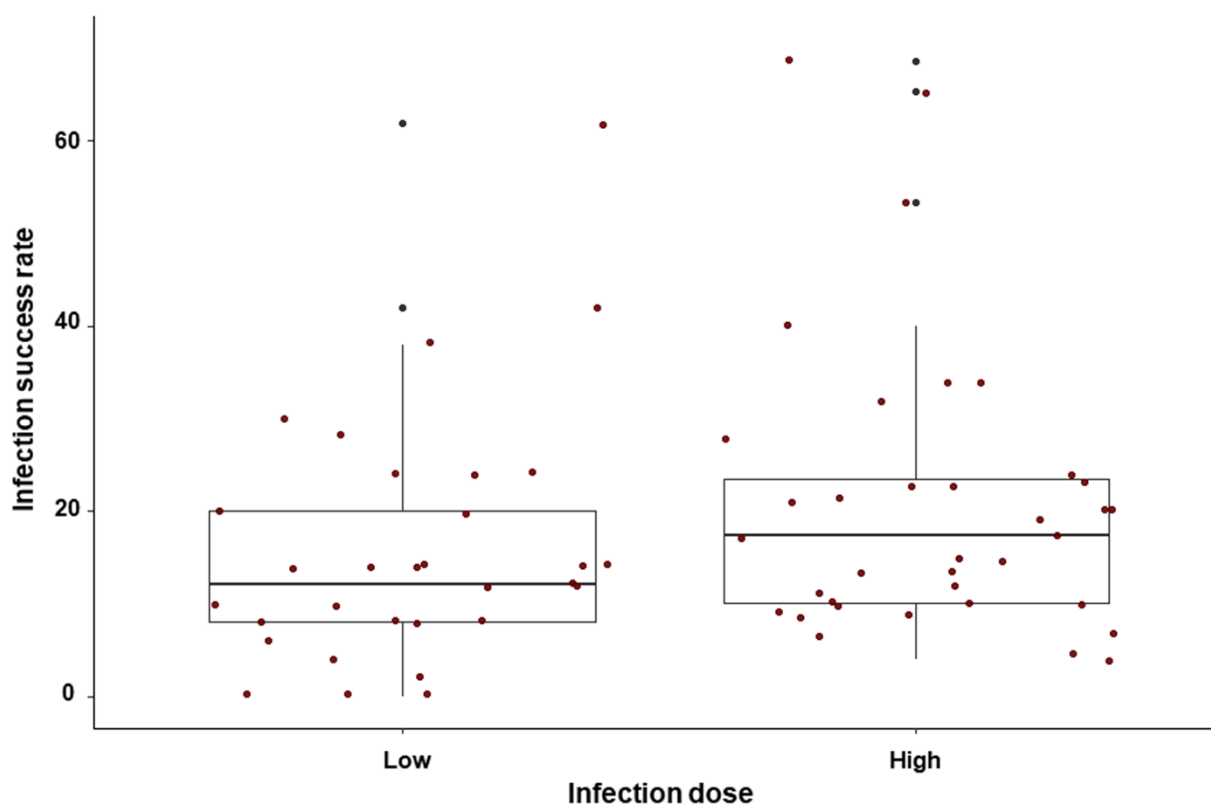

Supplementary data in this article will be archived in Figshare repository upon acceptance of the manuscript.
